# Supplementary material for: Interplay between water uptake, ion interactions, and conductivity in an e-beam grafted poly(ethylene-co-tetrafluoroethylene) anion exchange membrane
Source: Royal Society of Chemistry journal article supplement (doi:10.1039/c4cp05755d), 2014-12-23
Supplement: c4cp05755d1.pdf [file c4cp05755d1.pdf]

## Supplemental Information

### Interplay between water uptake, ion interactions, and conductivity in an e-beam grafted poly(ethylene-co-tetrafluoroethylene) anion exchange membrane

Tara P. Pandey,<sup>a</sup> Ashley M. Maes,<sup>a</sup> Himanshu N. Sarode,<sup>a</sup> Bethanne D. Peters,<sup>a</sup> Sandra Lavina,<sup>c</sup> Keti Vezzù,<sup>c</sup> Yuan Yang,<sup>b</sup> Simon D. Poynton,<sup>d</sup> John R. Varcoe,<sup>d</sup> Soenke Seifert,<sup>e</sup> Matthew W. Liberatore,<sup>a</sup> Vito Di Noto,<sup>c</sup> and Andrew M. Herring.<sup>a,\*</sup>

<sup>a</sup> Department of Chemical and Biological Engineering and <sup>b</sup>Department of Chemistry and Geochemistry, Colorado School of Mines, Golden, CO 80401, USA.

<sup>c</sup> Department of Chemical Sciences, University of Padova, Via Marzolo 1, I-35131 Padova, Italy

<sup>d</sup> Department of Chemistry, University of Surrey, Guildford GU2 7XH, UK

<sup>e</sup> X-Ray Science Division, Argonne National Laboratory, Argonne, IL 60439, USA

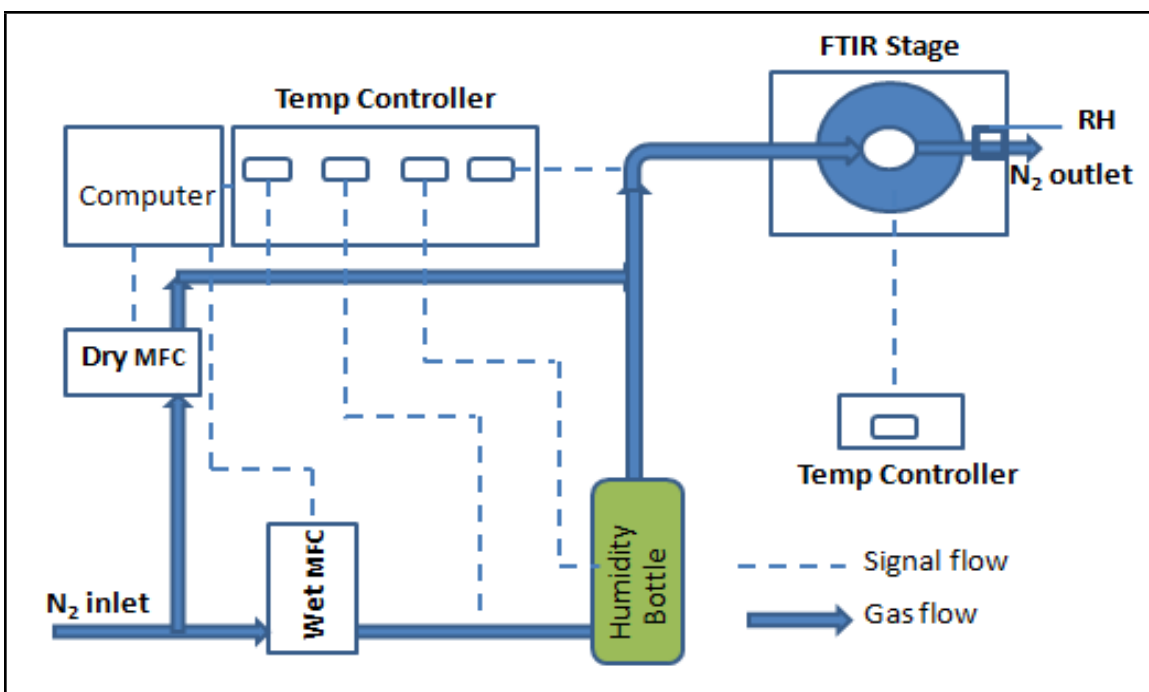

Figure S1: A schematic of a custom-built environmental control setup for the FT-IR spectroscopy

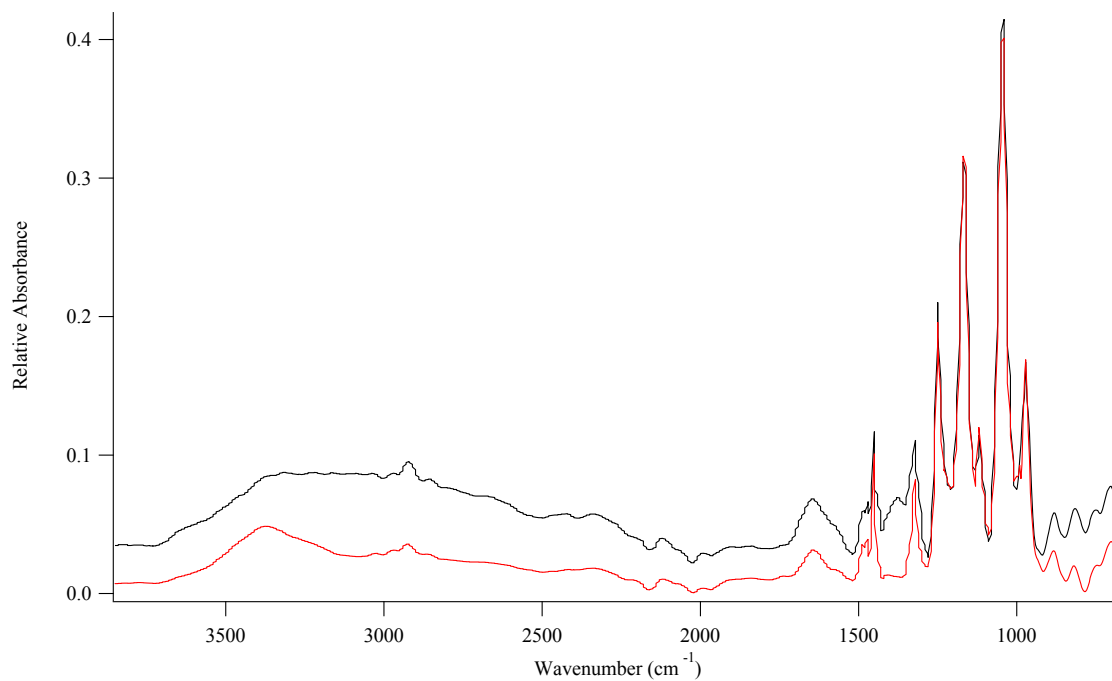

Figure S2: FT-IR spectra before (black) and after (red) conductivity measurements in hydroxide form.
